# Supplementary material for: ICOS deficiency hampers the homeostasis, development and function of NK cells
Source: PubMed Central journal article supplement (PMC6613708; doi:10.1371/journal.pone.0219449), 2019-07-08
Supplement: pone.0219449.s001.pdf [file pone.0219449.s001.pdf]

**A**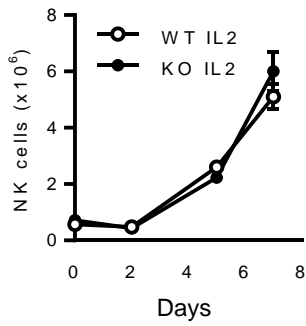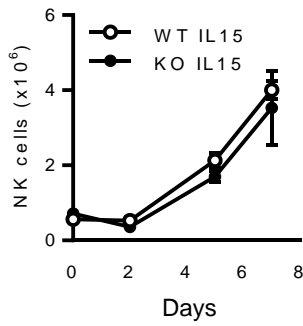**B**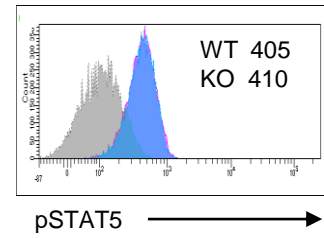**C**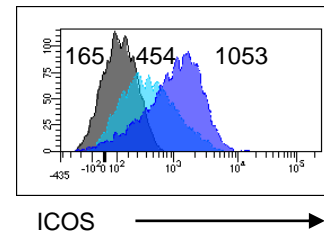**D**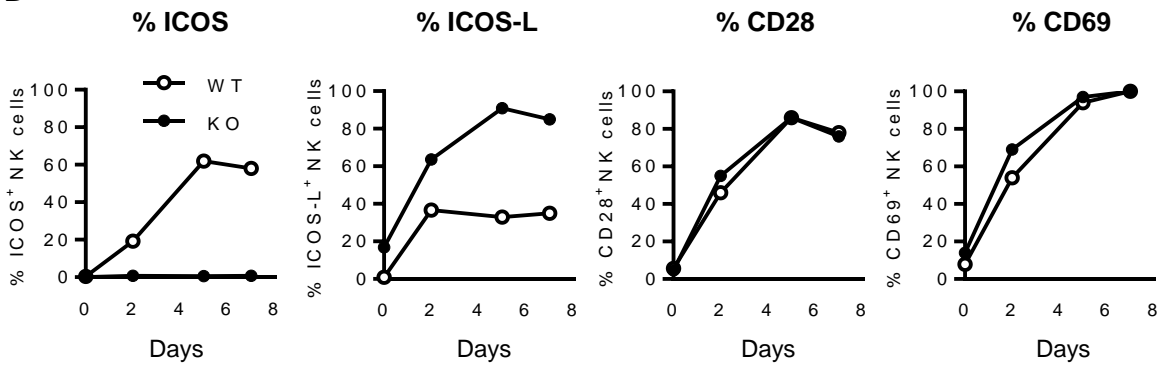**S1 Fig**
