# Supplementary material for: ICOS deficiency hampers the homeostasis, development and function of NK cells
Source: PubMed Central journal article supplement (PMC6613708; doi:10.1371/journal.pone.0219449), 2019-07-08
Supplement: pone.0219449.s002.pdf [file pone.0219449.s002.pdf]

**A Lymphoid cells**

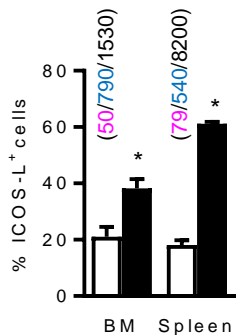

**B CD19+ B cells**

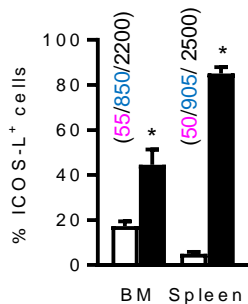

**C CD11c<sup>high</sup> cells**

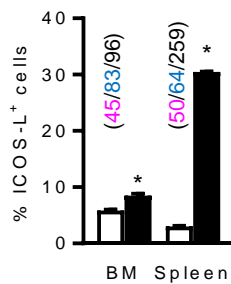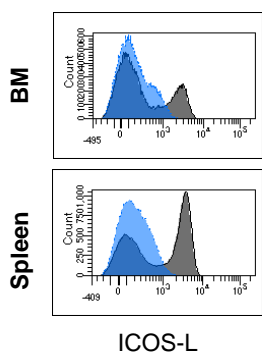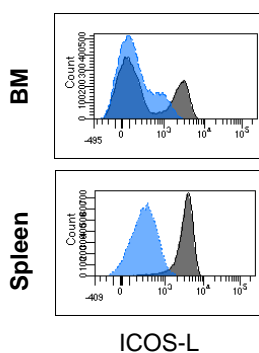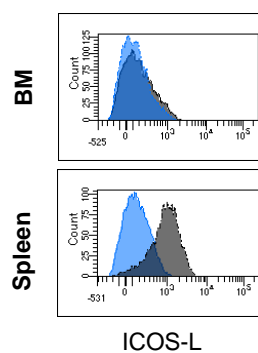

**D ICOS**

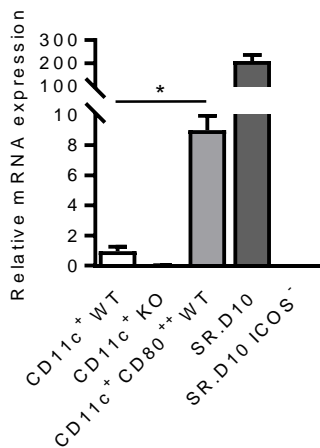

**E ICOS-L**

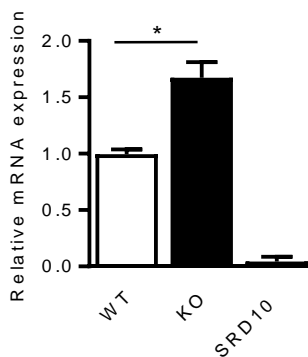

**S2 Fig**
