# Supplementary material for: ICOS deficiency hampers the homeostasis, development and function of NK cells
Source: PubMed Central journal article supplement (PMC6613708; doi:10.1371/journal.pone.0219449), 2019-07-08
Supplement: pone.0219449.s003.pdf [file pone.0219449.s003.pdf]

**A*****In vitro* NK cell response**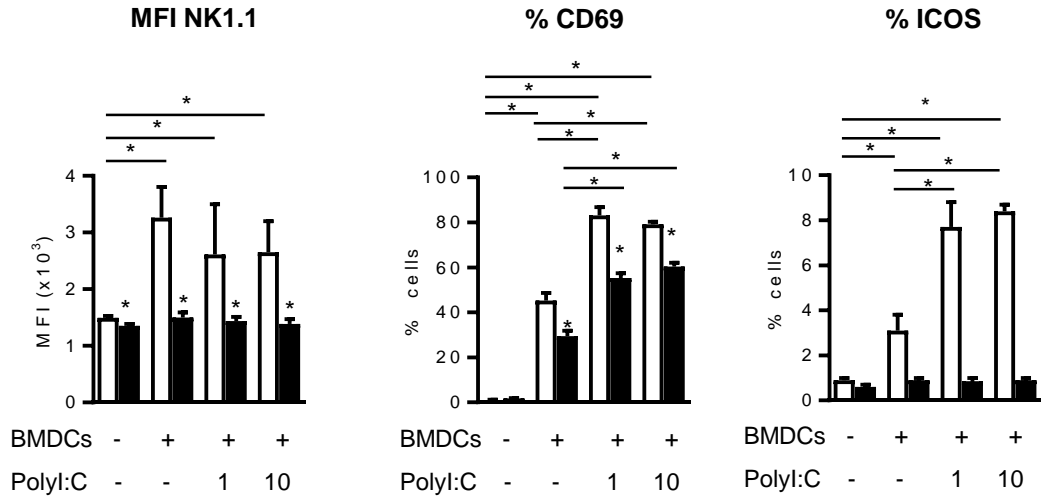***In vivo* NK cell response****B****Peritoneal exudate cells**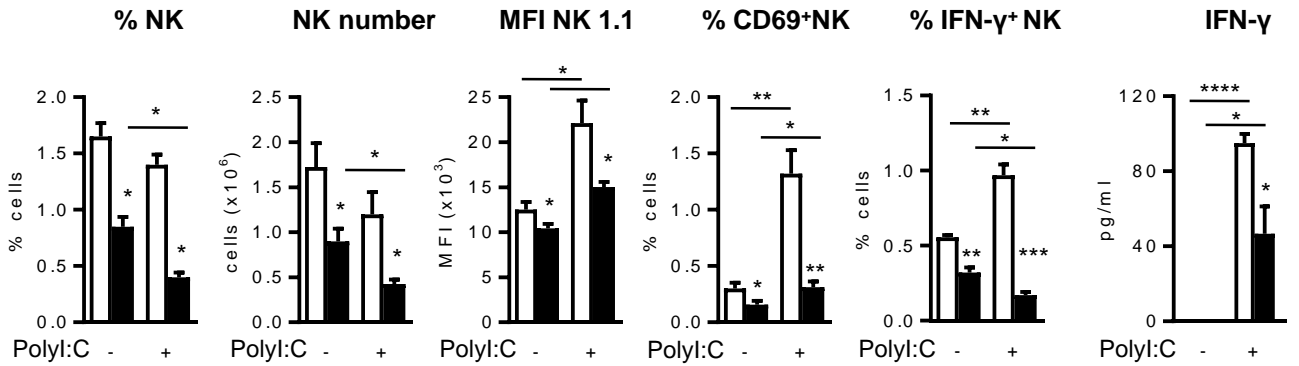**C Serum****S3 Fig**
