# Supplementary material for: ICOS deficiency hampers the homeostasis, development and function of NK cells
Source: PubMed Central journal article supplement (PMC6613708; doi:10.1371/journal.pone.0219449), 2019-07-08

Original blots Figure 7C

Original blot for Phospho-Akt Thr<sup>308</sup>

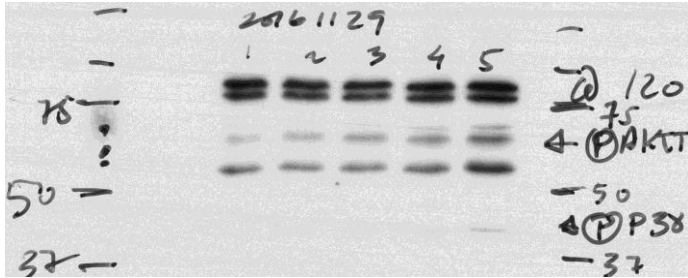

Original blot for Akt load

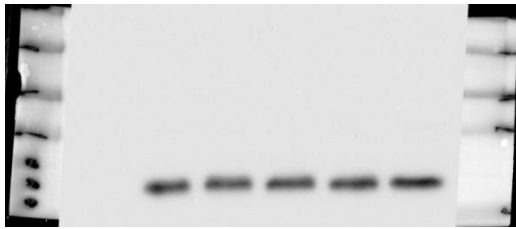

Original blots Figure 7D, E

Original blot for Phospho-Akt Phospho-Ser<sup>473</sup>

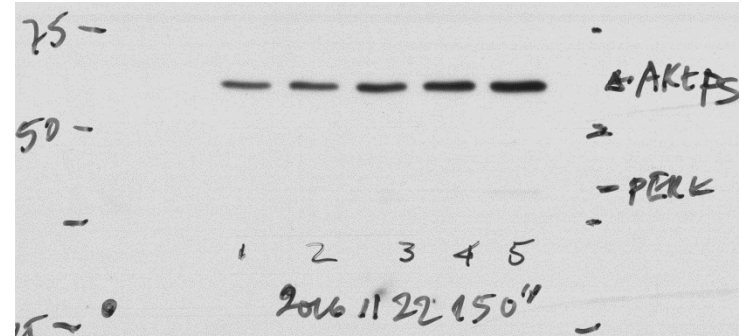

Original blot for Phospho-Erk

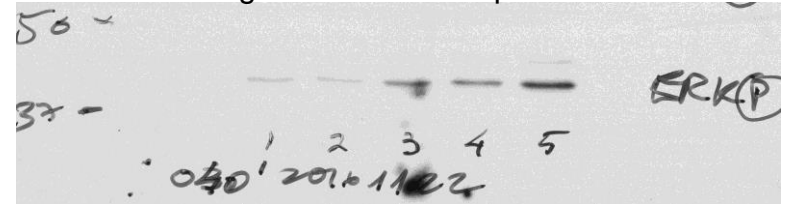

Original blot for Akt load (top) and Erk (bottom)

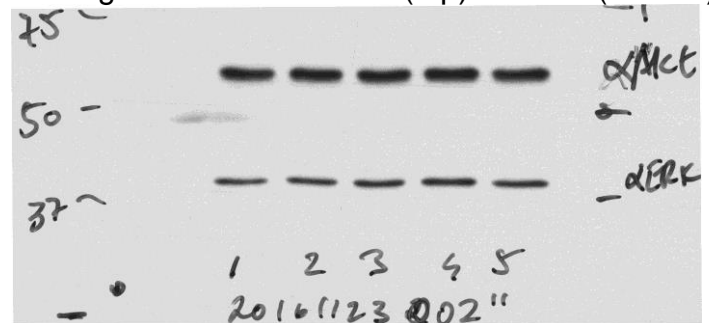

Original blots Figure 7F

Original blot for Phospho-P38

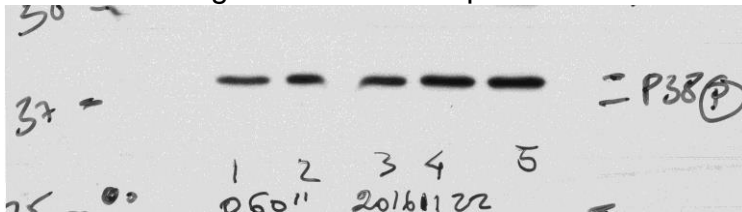

Original blot for P38 load

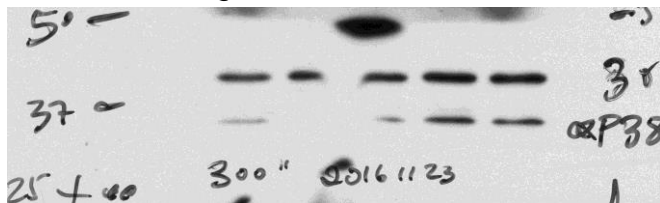

Supplement: pone.0219449.s005.pdf [file pone.0219449.s005.pdf]
